# Supplementary material
Source: PubMed Central journal article supplement (PMC1664862)
Supplement: jphysiol_2003.056101_1.pdf [file jphysiol_2003.056101_1.pdf]

|            |   |   |   |   |   |   |   |   |   |   |   |   |   |   |   |   |   |   |   |   |   |   |   |   |   |     |     |
|------------|---|---|---|---|---|---|---|---|---|---|---|---|---|---|---|---|---|---|---|---|---|---|---|---|---|-----|-----|
| Kir3.2_rat | E | I | L | W | G | Y | R | F | T | P | V | L | T | L | - | E | D | G | F | Y | E | V | D | Y | N | S   | 355 |
| Kir3.4_rat | E | V | L | W | G | H | R | F | T | P | V | L | T | L | - | E | K | G | F | Y | E | V | D | Y | N | T   | 350 |
| Kir3.3_rat | E | V | L | W | G | H | R | F | T | S | V | L | T | L | - | E | D | G | F | Y | E | V | D | Y | A | S   | 321 |
| Kir3.1_rat | E | V | L | W | G | H | R | F | F | P | V | I | S | L | - | E | E | G | F | K | V | D | Y | S | Q | 344 |     |
| Kir6.1_rat | E | I | Q | W | G | H | R | F | V | S | I | V | T | E | - | E | E | G | V | Y | S | V | D | Y | S | K   | 341 |
| Kir6.2_rat | E | I | L | W | G | Q | R | F | V | P | I | V | A | E | - | E | D | G | R | Y | S | V | D | Y | S | K   | 332 |
| Kir2.2_rat | E | I | L | W | G | H | R | F | E | P | V | L | F | E | - | E | K | N | Q | Y | K | I | D | Y | S | H   | 344 |
| Kir2.3_rat | E | I | L | W | G | H | R | F | E | P | V | V | F | E | - | E | K | S | H | Y | K | V | D | Y | S | R   | 335 |
| Kir2.1_rat | E | I | L | W | G | H | R | Y | E | P | V | L | F | E | - | E | K | H | C | Y | K | V | D | Y | S | R   | 343 |
| Kir5.1_rat | E | I | L | W | G | H | R | F | H | D | V | L | E | V | - | K | R | K | Y | Y | K | V | N | C | L | Q   | 327 |
| Kir1.1_rat | E | V | L | W | G | Y | R | F | V | P | I | V | S | K | T | K | E | G | K | Y | R | V | D | F | H | N   | 343 |
| Kir4.1_rat | E | I | L | W | G | Y | E | F | T | P | A | I | S | L | S | A | S | G | K | Y | V | A | D | F | S | L   | 329 |
| Kir4.2_rat | E | I | Y | W | G | F | E | F | V | P | V | S | L | S | K | N | G | K | Y | V | A | D | F | S | Q | 329 |     |
| Kir7.1_rat | E | I | M | L | H | H | R | F | A | A | L | M | T | R | G | S | K | G | E | Y | Q | V | K | M | E | N   | 317 |
